# Supplementary material
Source: PubMed Central journal article supplement (PMC3758765)
Supplement: NIHMS503306-supplement-supplement_1.pdf [file NIHMS503306-supplement-supplement_1.pdf]

## Electronic supplementary material

**ESM Table 1** Relative risk (95% CI) of developing type 2 diabetes, calculated by quintiles of IL-18 levels with additional adjustment for pro-inflammatory protein levels (in sub-sample)

| Variables                             | Quintile of IL-18 concentration <sup>a</sup> |                       |                       |                       |                        | <i>p</i> value for trend |
|---------------------------------------|----------------------------------------------|-----------------------|-----------------------|-----------------------|------------------------|--------------------------|
|                                       | 1 (lowest)                                   | 2                     | 3                     | 4                     | 5 (highest)            |                          |
| Median (range)                        | 160.1 (78.39–191.17)                         | 215.2 (191.64–238.69) | 260.4 (329.24–287.84) | 329.3 (287.91–383.76) | 462.5 (384.13–2100.63) |                          |
| Cases, <i>n</i> <sup>b</sup>          | 65                                           | 83                    | 93                    | 194                   | 245                    |                          |
| Controls, <i>n</i> <sup>b</sup>       | 116                                          | 117                   | 117                   | 117                   | 117                    |                          |
| Multivariate RR (95% CI) <sup>c</sup> | Referent                                     | 1.03 (0.74–1.43)      | 1.03 (0.75–1.42)      | 1.33 (1.00–1.78)      | 1.38 (1.04–1.83)       | 0.002                    |
| Multivariate RR (95% CI) <sup>d</sup> | Referent                                     | 1.03 (0.74–1.43)      | 1.04 (0.75–1.43)      | 1.31 (0.98–1.75)      | 1.34 (1.01–1.78)       | 0.03                     |
| Multivariate RR (95% CI) <sup>e</sup> | Referent                                     | 1.03 (0.74–1.42)      | 1.03 (0.75–1.42)      | 1.33 (1.00–1.78)      | 1.37 (1.02–1.82)       | 0.003                    |
| Multivariate RR (95% CI) <sup>f</sup> | Referent                                     | 1.04 (0.74–1.46)      | 1.05 (0.75–1.46)      | 1.35 (1.00–1.82)      | 1.40 (1.05–1.88)       | 0.001                    |
| Multivariate RR (95% CI) <sup>g</sup> | Referent                                     | 0.99 (0.71–1.38)      | 1.02 (0.73–1.42)      | 1.26 (0.93–1.71)      | 1.24 (0.92–1.67)       | 0.03                     |

<sup>a</sup>Quintiles based on control distribution (in the sub-sample with CRP measured)

<sup>b</sup>Total numbers *n*=680 / 584 (cases/controls)

<sup>c</sup>Adjusted for (1) matching factors (age, date of blood draw, fasting status and ethnicity); (2) diabetes risk factors (physical activity in quintiles of MET /week, smoking [never, past, current 1–14 cigarettes/day and current ≥15 cigarettes/day], family history of diabetes [yes/no], hormone replacement therapy [premenopausal, never, past, current and information not available], alcohol consumption [non-drinkers, 0.1–4.9, 5–10 and >10 g/day], glycaemic load [quintiles], ratio of polyunsaturated : saturated fat [quintiles] and intake [quintiles] of cereal fibre, *trans* fat, magnesium and total energy); and (3) BMI by category (<23, 23–24.9, 25–26.9, 27–29.9, 30–34.9 and ≥35 kg/m<sup>2</sup>)

<sup>d</sup>Adjusted as <sup>c</sup> above and additionally for CRP

<sup>e</sup>Adjusted as <sup>c</sup> above and additionally for TNFr2

<sup>f</sup>Adjusted as <sup>c</sup> above and additionally for IL-6

<sup>g</sup>Adjusted as <sup>c</sup> above and additionally for all biomarkers (HMW adiponectin, resistin, CRP, IL-6, TNFr2)
